# Supplementary material for: Tropospheric BrO column densities in the Arctic derived from satellite: retrieval and comparison to ground-based measurements
Source: Copernicus journal article supplement (doi:10.5194/amt-5-2779-2012), 2012-11-16

Supplement to:  
Tropospheric BrO column densities in the  
Arctic derived from satellite: retrieval and  
comparison to ground-based measurements

|           |           |               |            |
|-----------|-----------|---------------|------------|
| H. Sihler | U. Platt  | S. Beirle     | T. Marbach |
| S. Kühl   | S. Dörner | J. Verschaeve | U. Frieß   |
| D. Pöhler | L. Vogel  | R. Sander     | T. Wagner  |

This document contains two sets of maps corresponding to two field campaigns conducted in the course of the International Polar Year 2007–2008. The maps show gridded tropospheric column densities of bromine monoxide (BrO) measured by the GOME-2 instrument in the vicinity of two different locations where ground-based measurements of BrO and many other trace-gas species were performed. In spring 2008, ship-based measurements were performed aboard the research icebreaker Amundsen south of Banks Island in the Amundsen Gulf. In spring 2009, ground-based measurements were performed at Barrow, Alaska. Both field initiatives were conducted in the scope of the Ocean – Atmosphere – Sea Ice – Snowpack (OASIS) project.

The BrO maps are averaged tropospheric column densities retrieved from measurements within the denoted day. On some days, however, there is no valid data present. Furthermore, only those measurements are averaged, which feature a solar zenith angle (SZA) smaller than  $80^\circ$ , and a tropospheric air-mass factor (AMF) larger than 1. The location of the ground-based measurements – the Amundsen research vessel, or Barrow, respectively – are marked with a white circle in the center of the map.



# Amundsen 2008

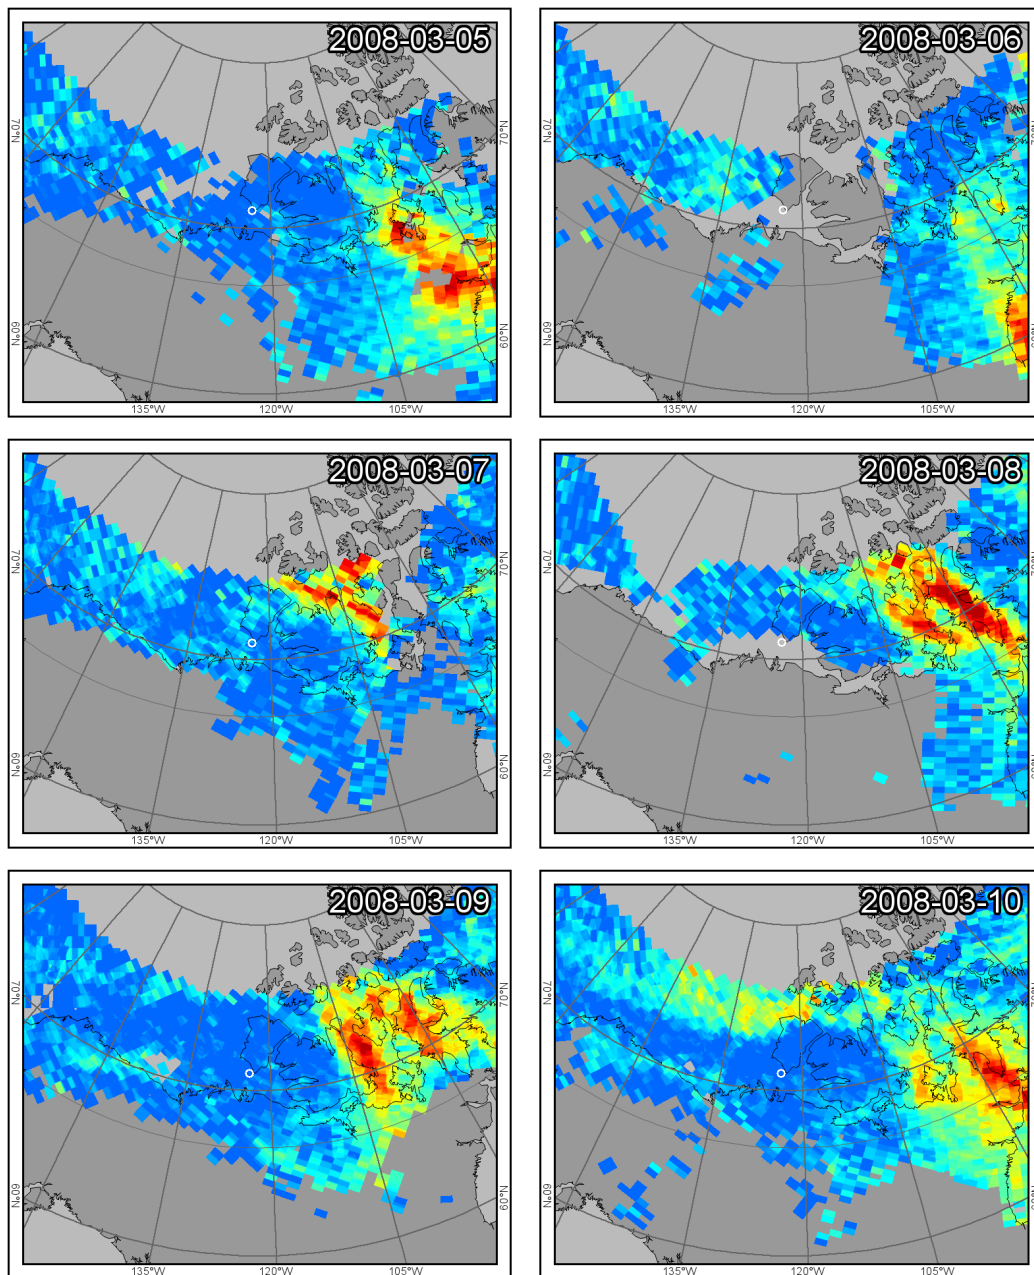

[ $10^{13}$  molec  $\text{cm}^{-2}$ ]

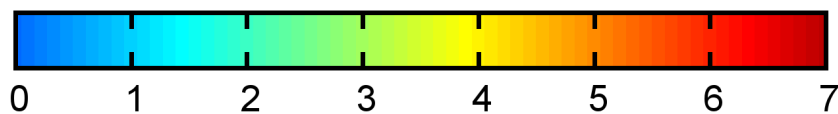

# Amundsen 2008

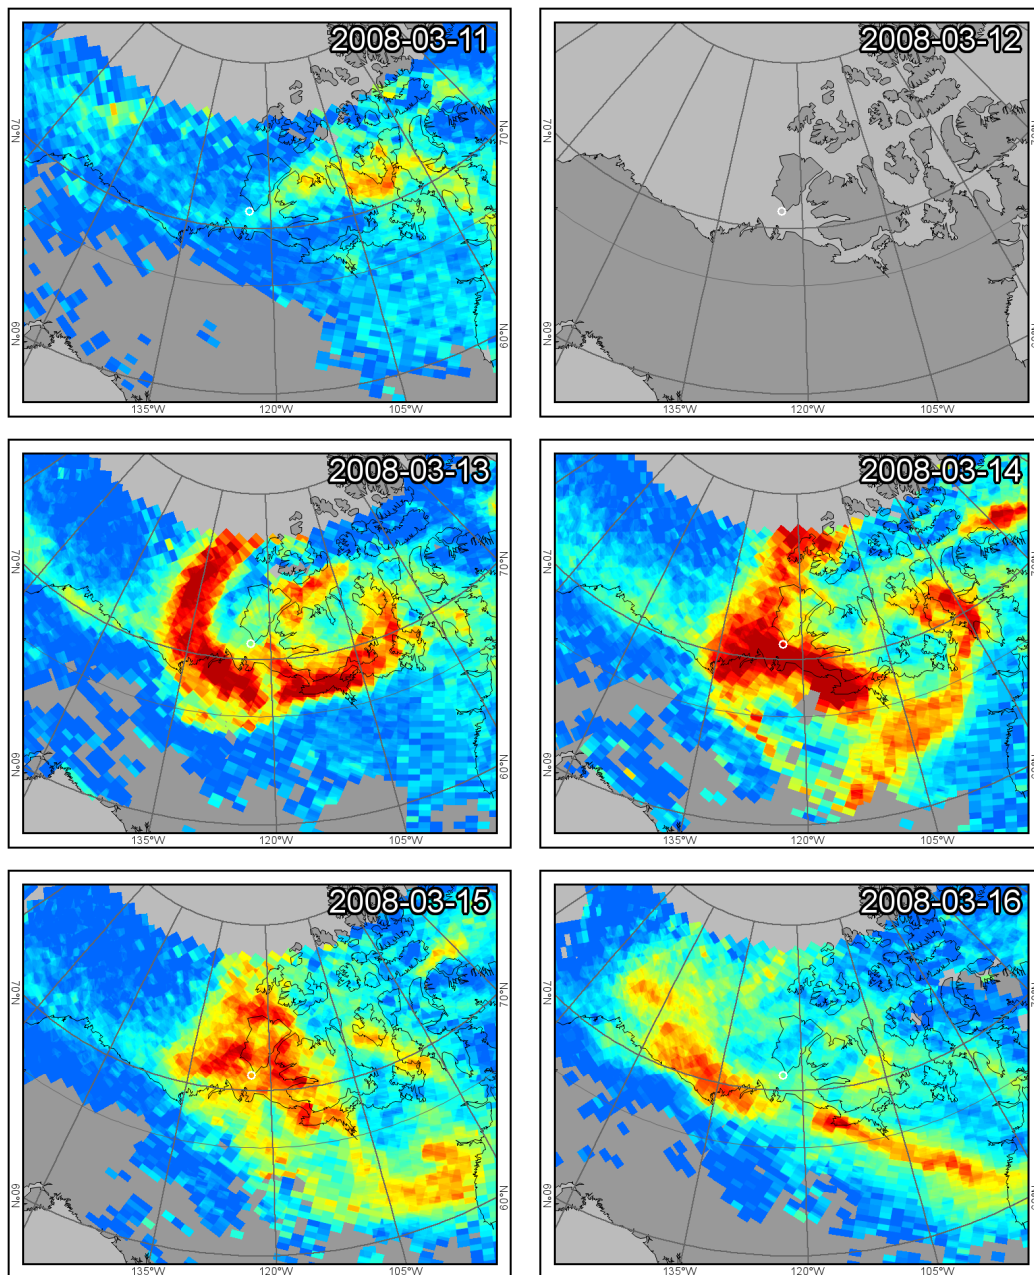

[ $10^{13}$  molec  $\text{cm}^{-2}$ ]



# Amundsen 2008

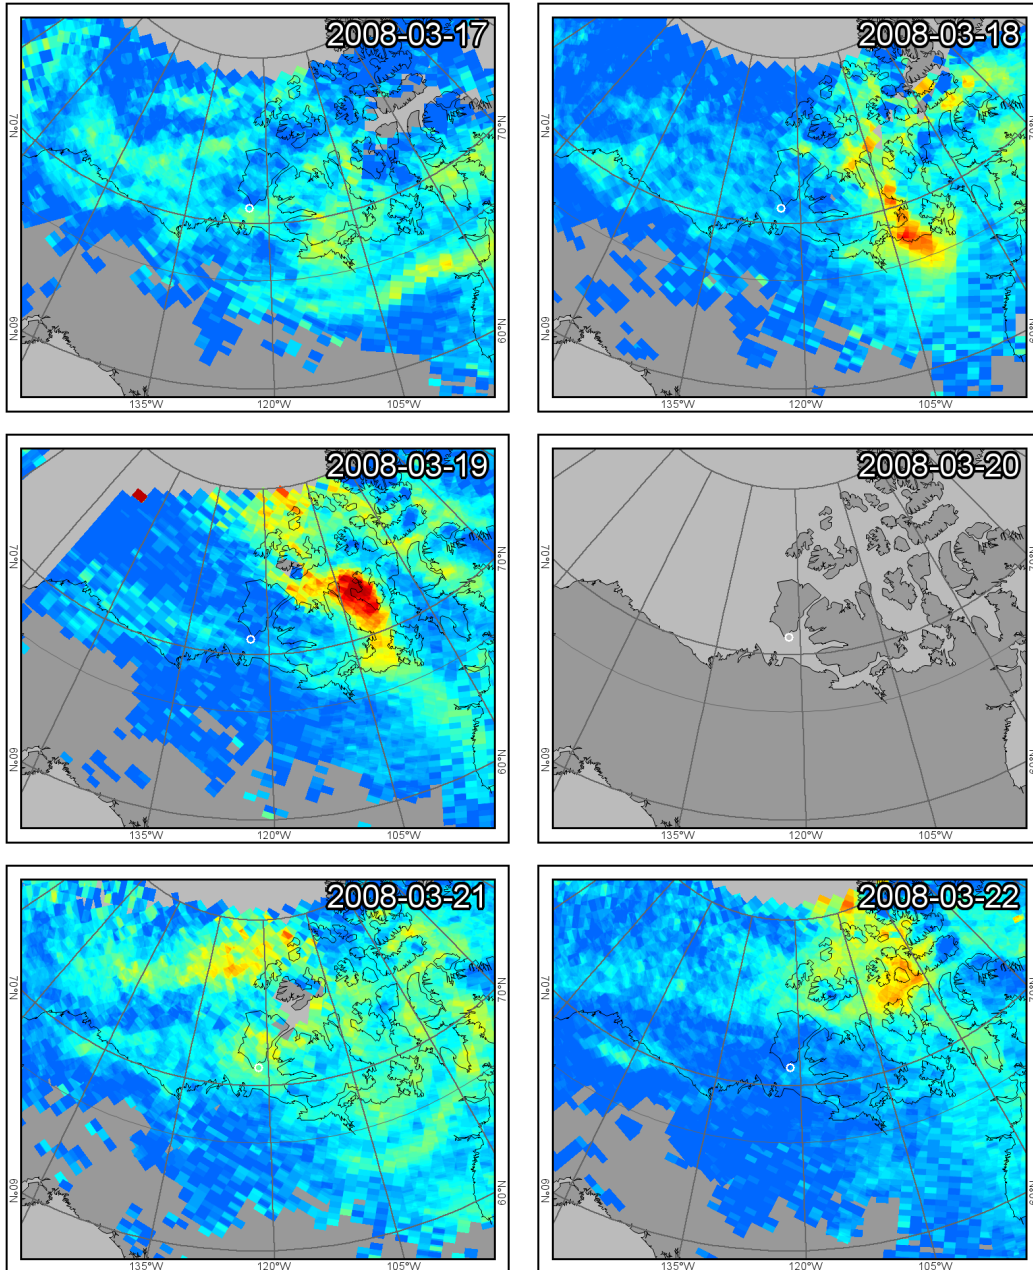

[ $10^{13}$  molec  $\text{cm}^{-2}$ ]

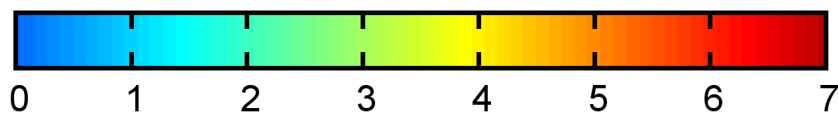

# Amundsen 2008

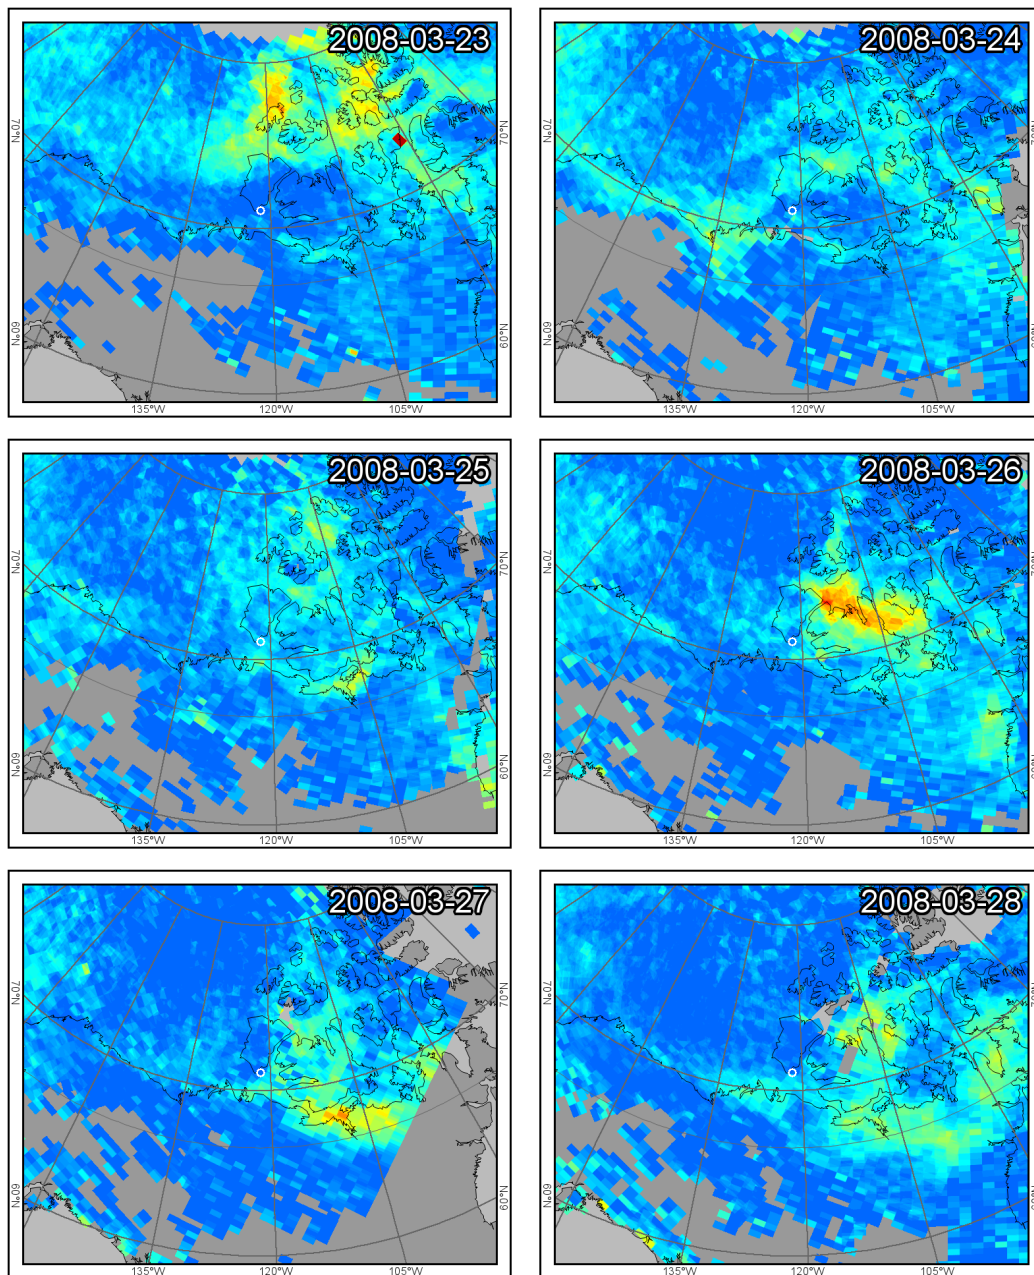

[ $10^{13}$  molec  $\text{cm}^{-2}$ ]



# Amundsen 2008

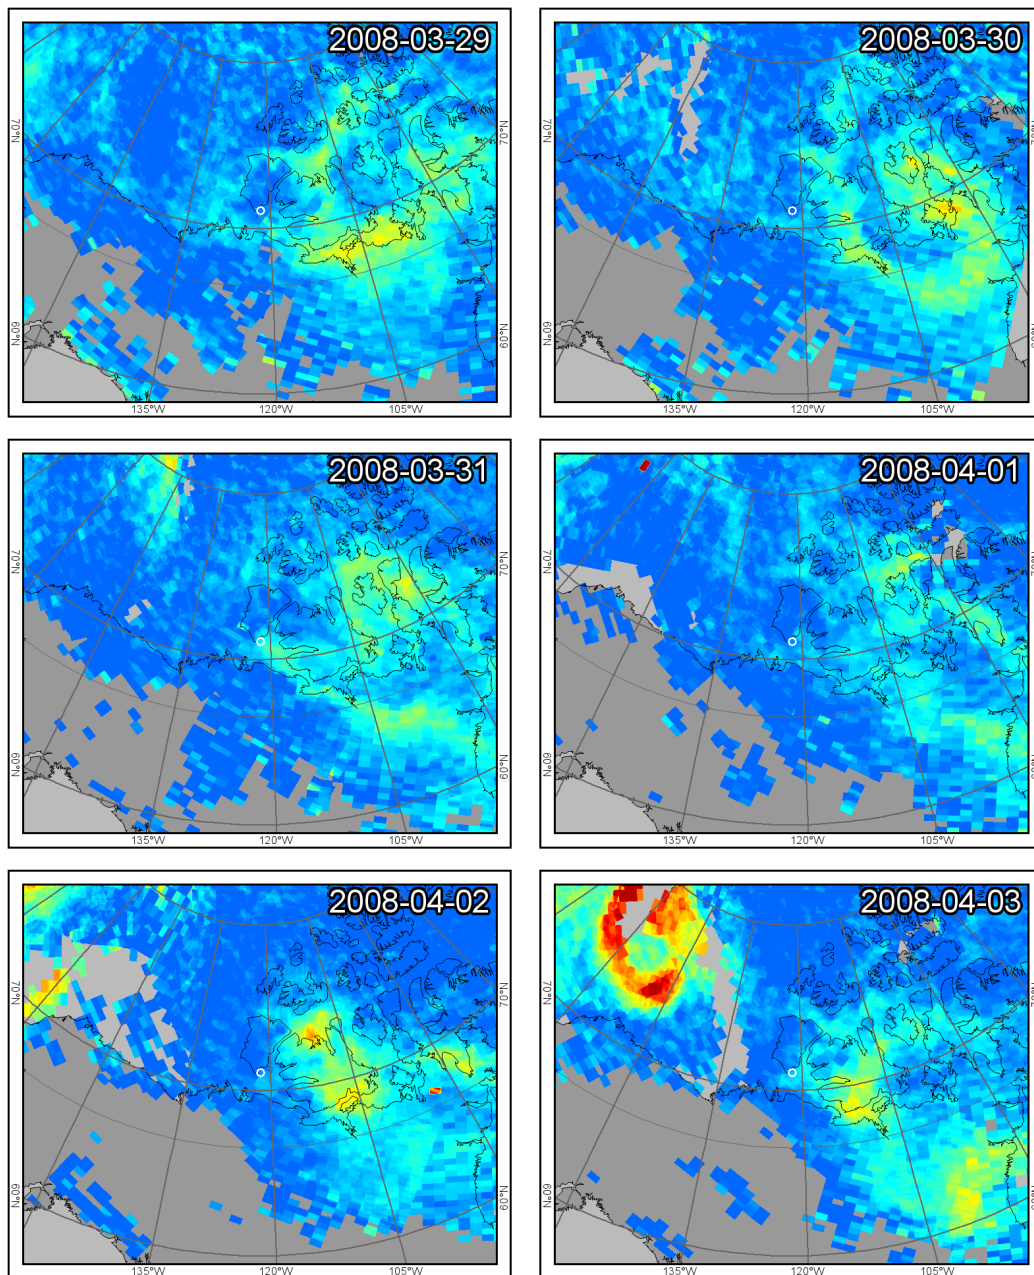

[ $10^{13} \text{ molec cm}^{-2}$ ]



# Amundsen 2008

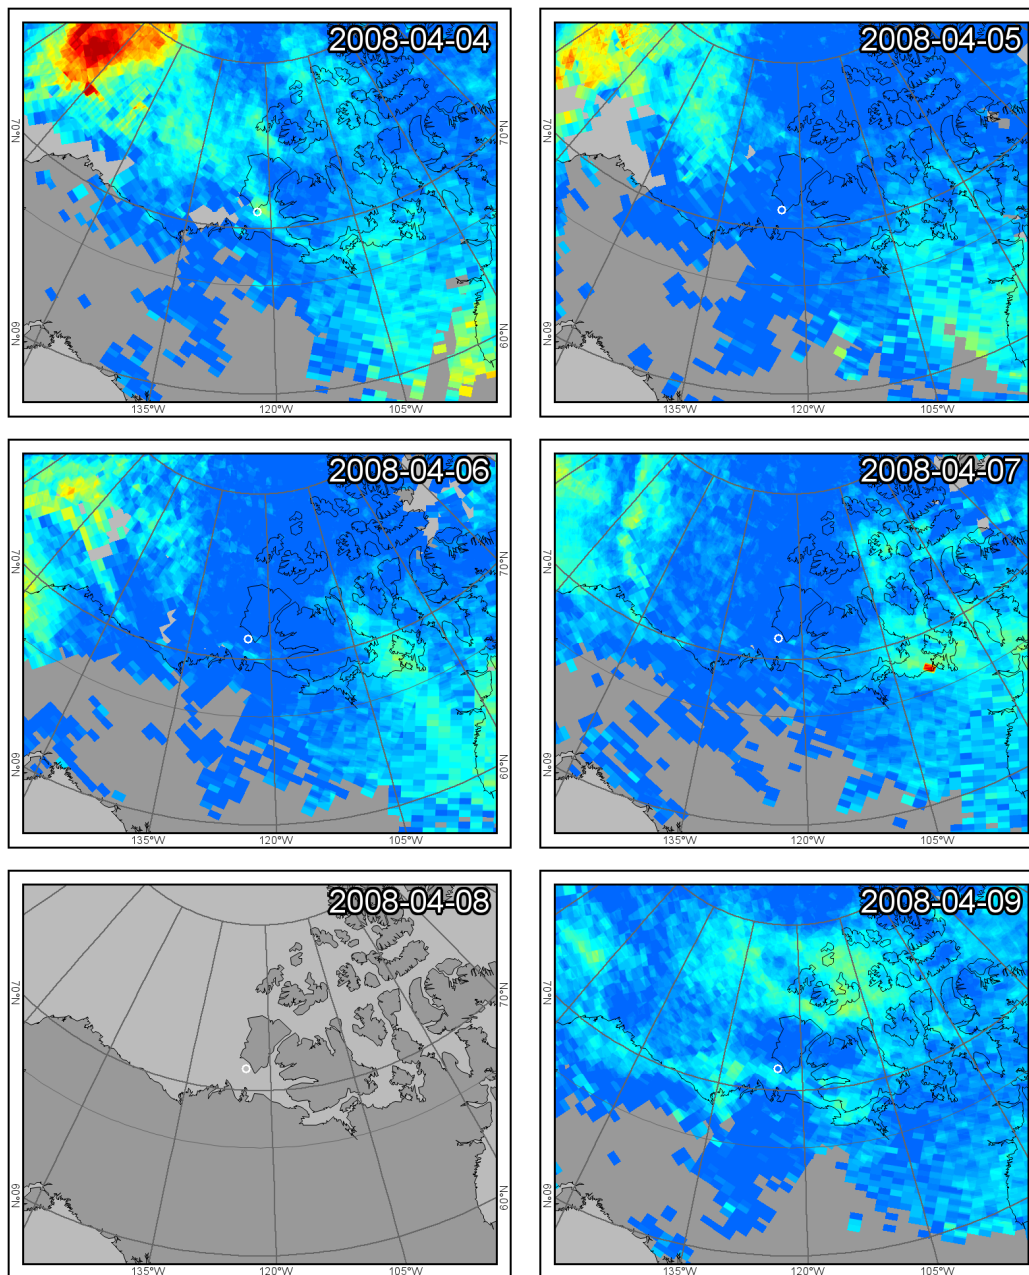

[ $10^{13}$  molec  $\text{cm}^{-2}$ ]

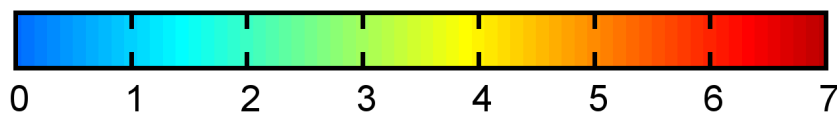



# Amundsen 2008

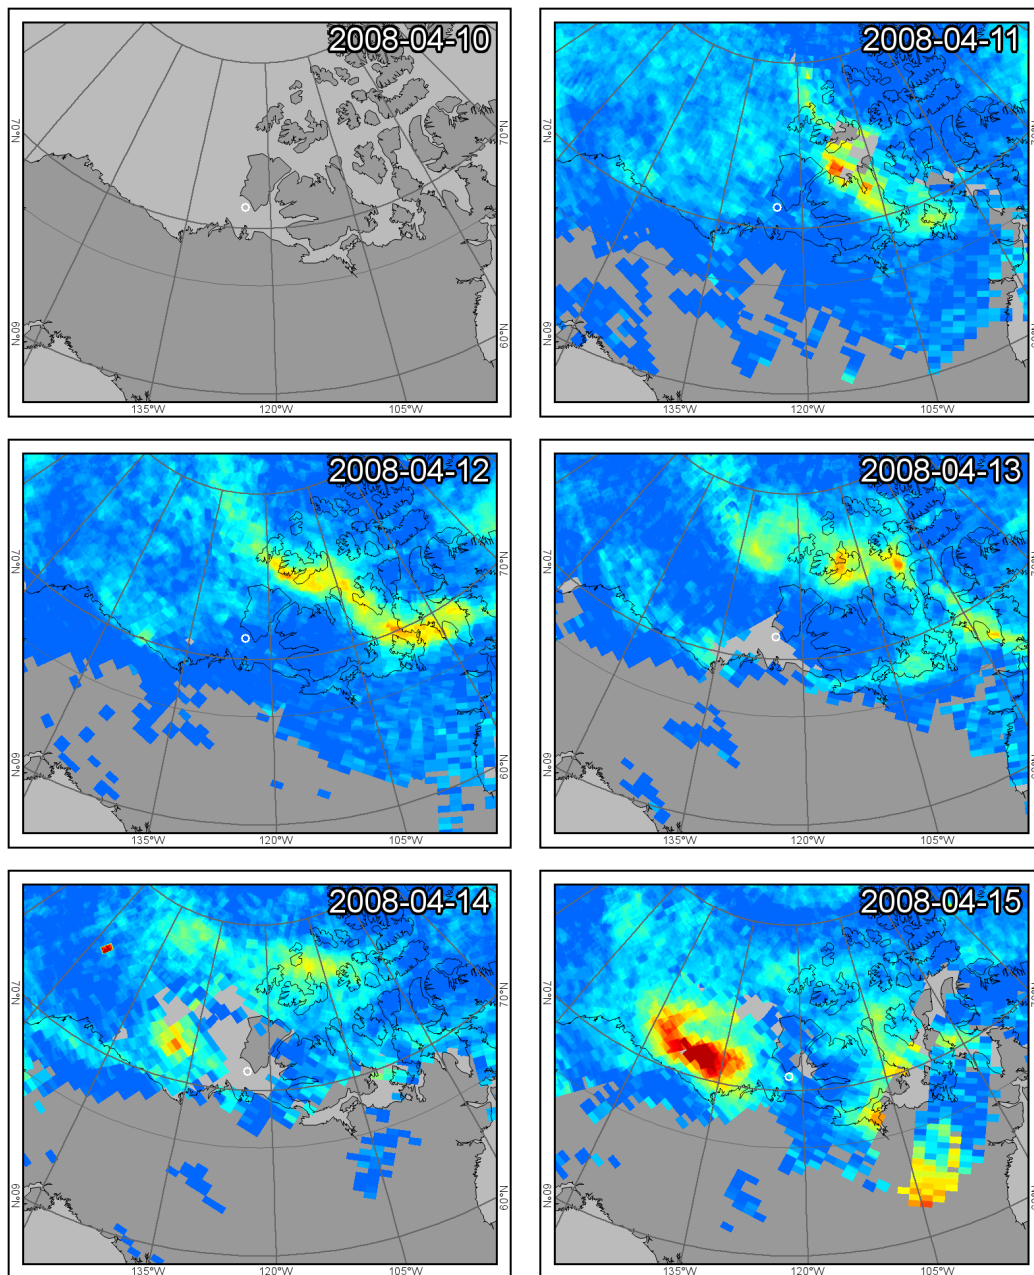

[ $10^{13}$  molec  $\text{cm}^{-2}$ ]



# Amundsen 2008

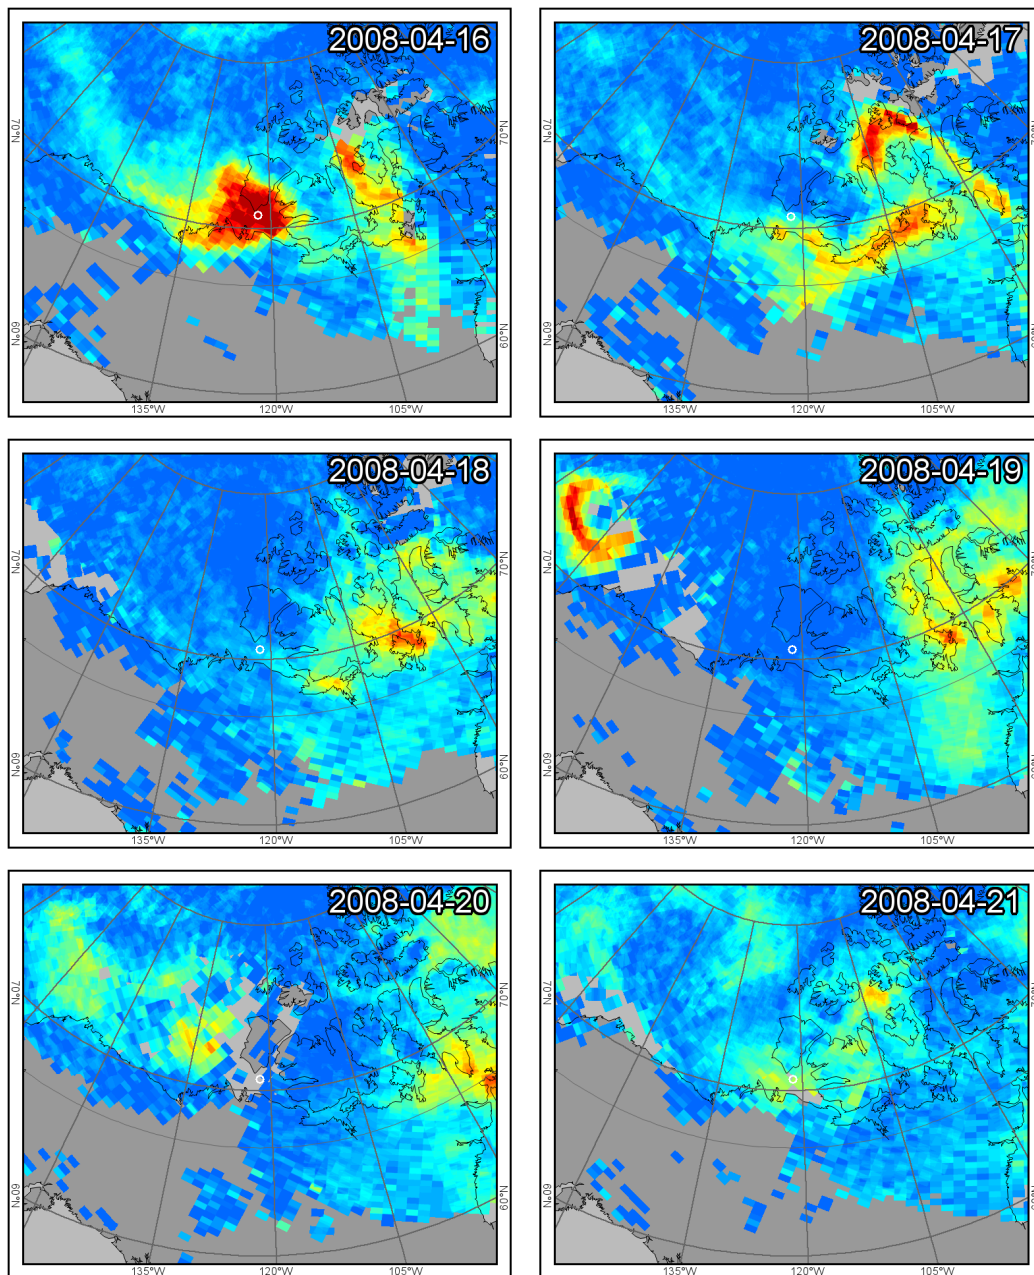

[ $10^{13}$  molec  $\text{cm}^{-2}$ ]





# Barrow 2009

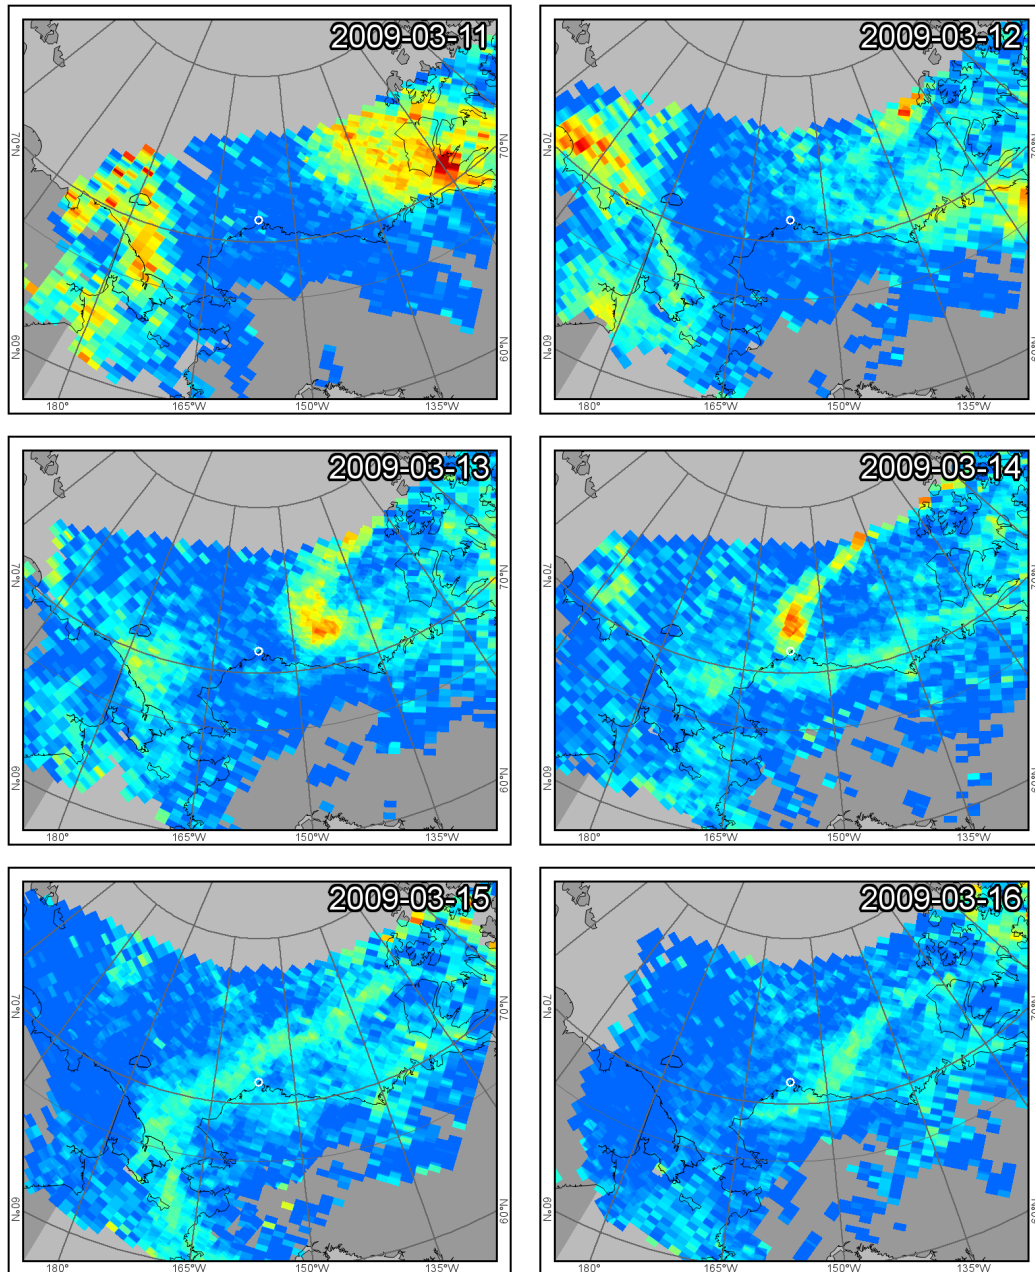

[ $10^{13}$  molec  $\text{cm}^{-2}$ ]



# Barrow 2009

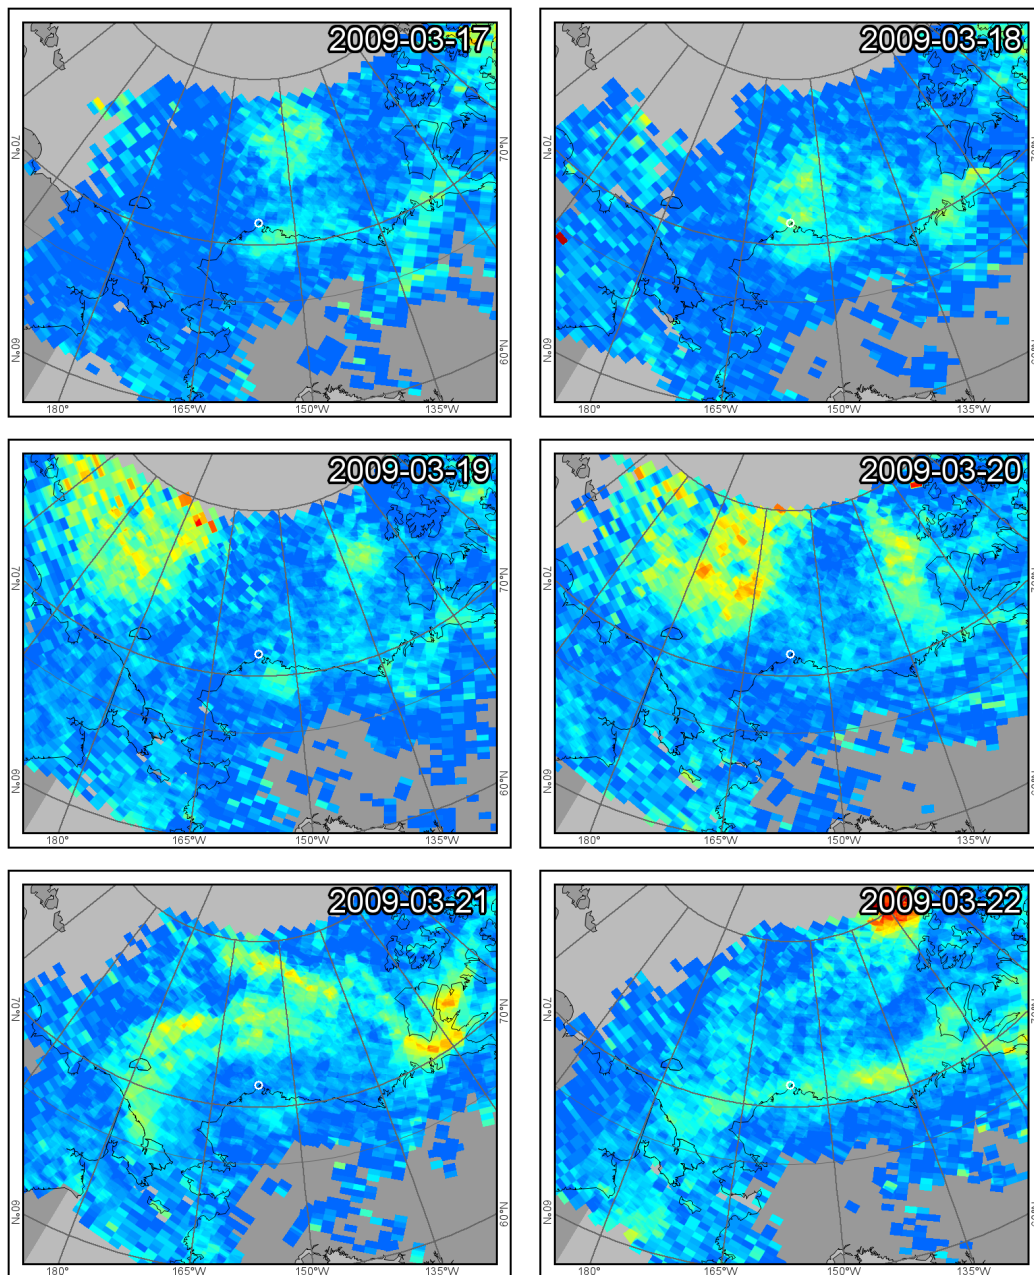

[ $10^{13}$  molec  $\text{cm}^{-2}$ ]



# Barrow 2009

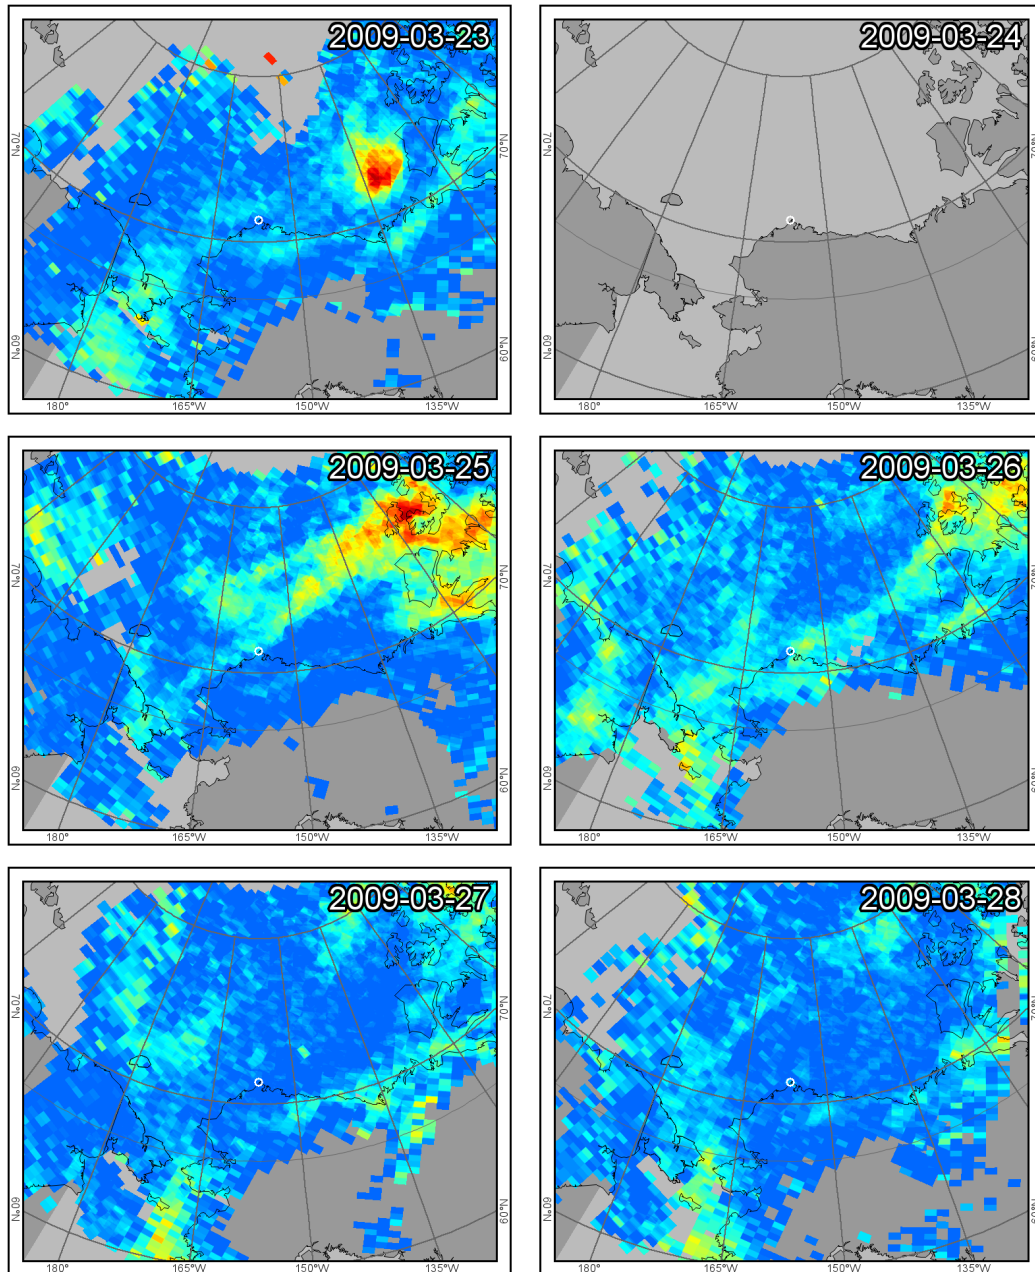

[ $10^{13}$  molec  $\text{cm}^{-2}$ ]

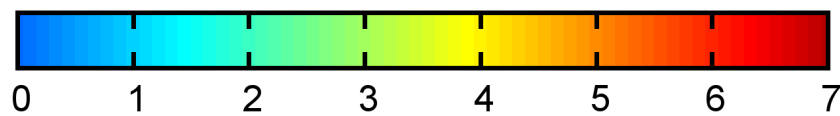

# Barrow 2009

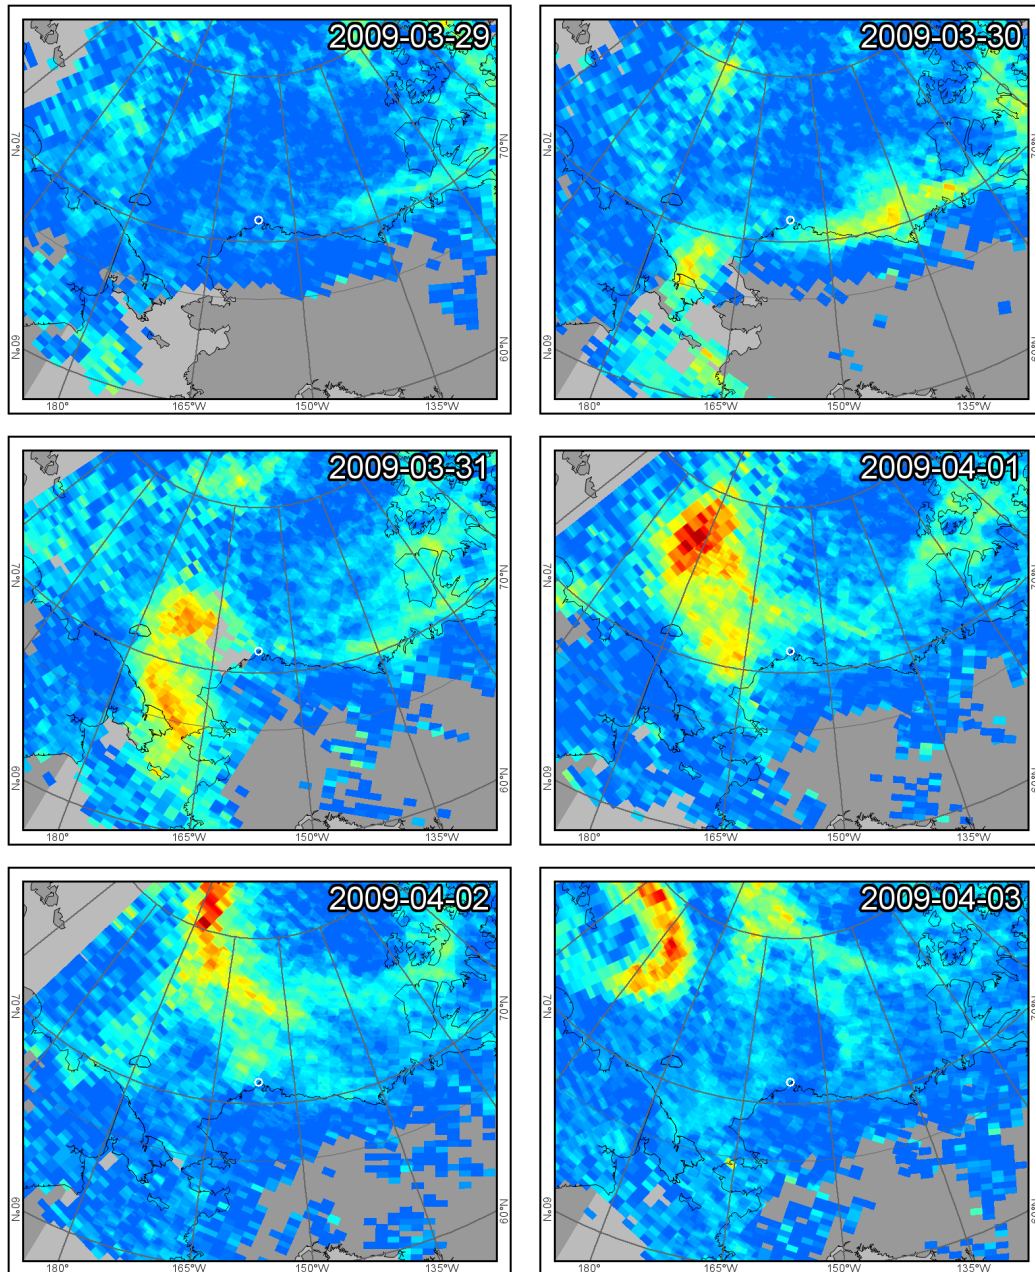

[ $10^{13}$  molec  $\text{cm}^{-2}$ ]

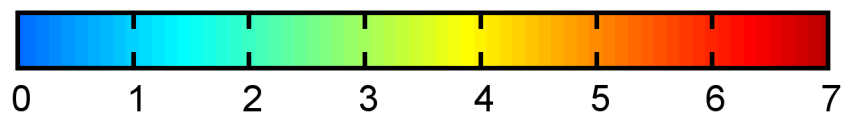

# Barrow 2009

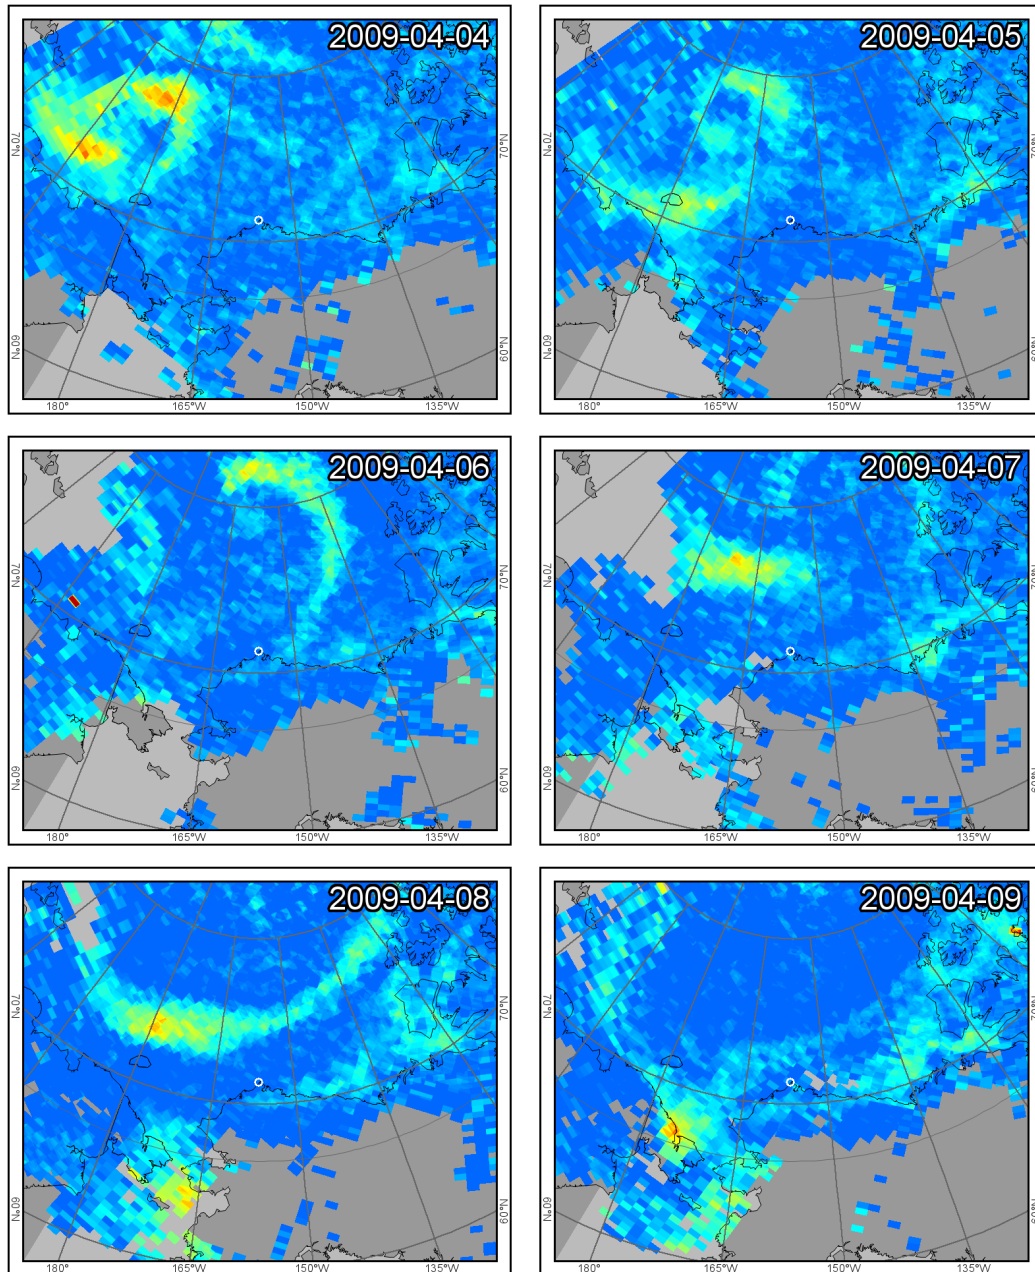

[ $10^{13}$  molec  $\text{cm}^{-2}$ ]





# Barrow 2009

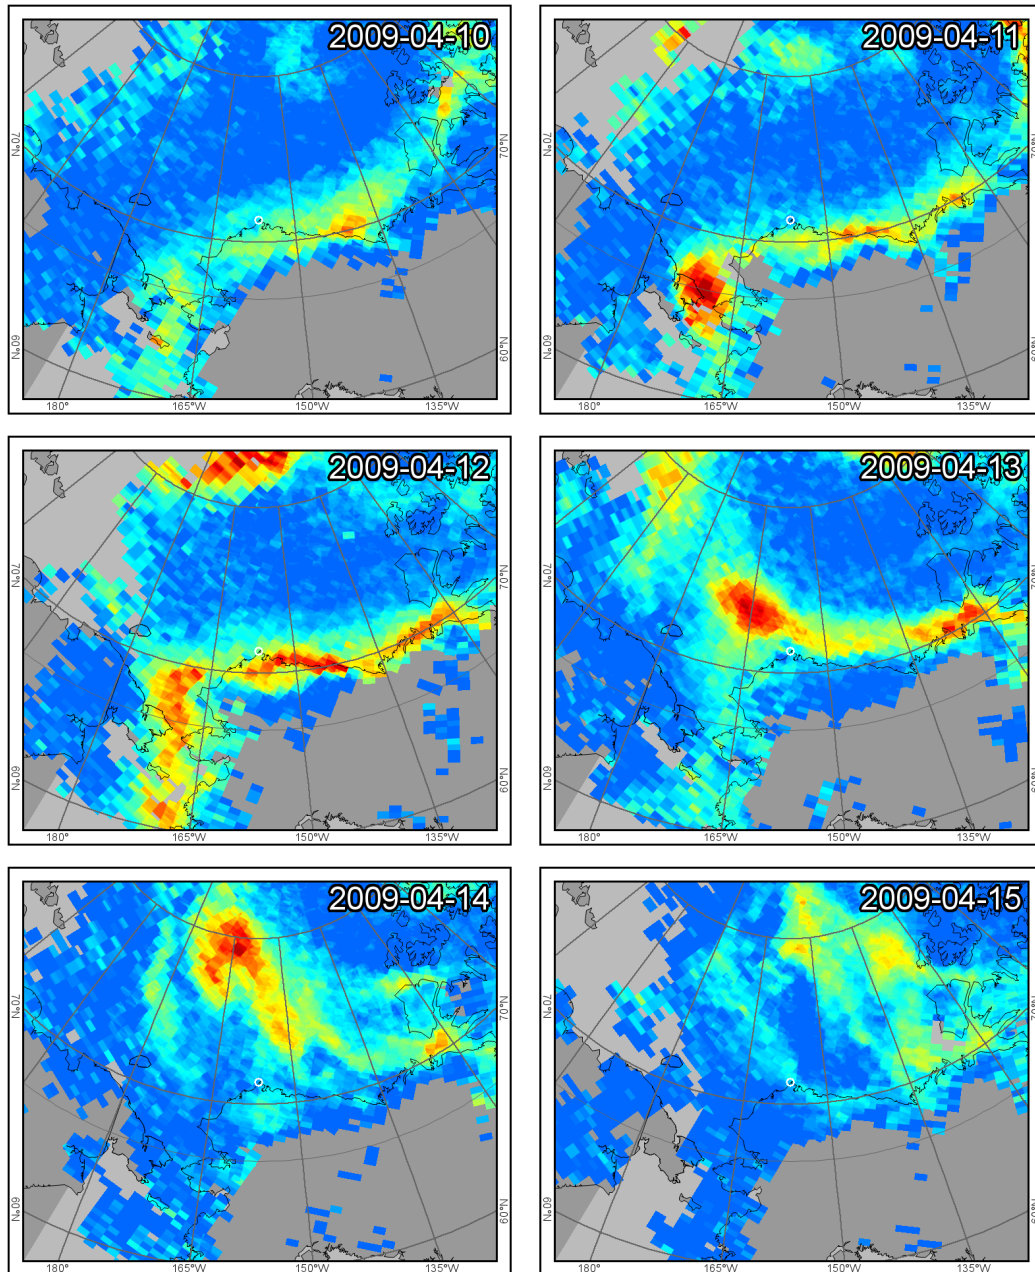

[ $10^{13}$  molec  $\text{cm}^{-2}$ ]



# Barrow 2009

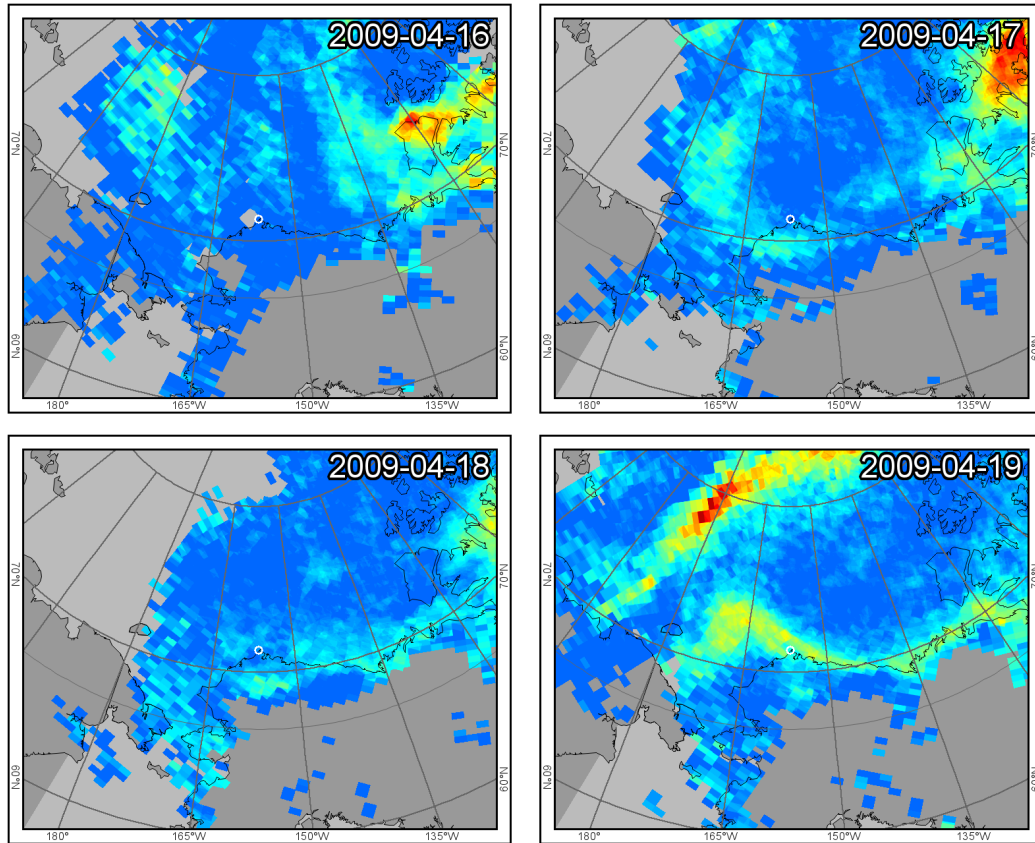

[ $10^{13}$  molec  $\text{cm}^{-2}$ ]

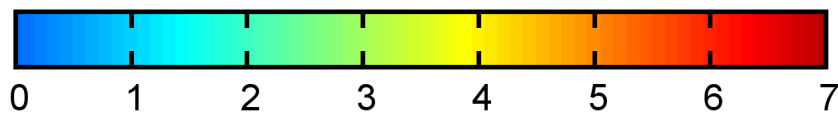

Supplement: Supplementary file 1 [file amt-5-2779-2012-supplement.pdf]
